# Supplementary material for: Evidence for renoxification in the tropical marine boundary layer
Source: Copernicus journal article supplement (doi:10.5194/acp-17-4081-2017), 2017-03-27
Supplement: Supplementary file 1 [file acp-17-4081-2017-supplement.zip]

## Cape Verde Atmospheric Observatory (CVO)

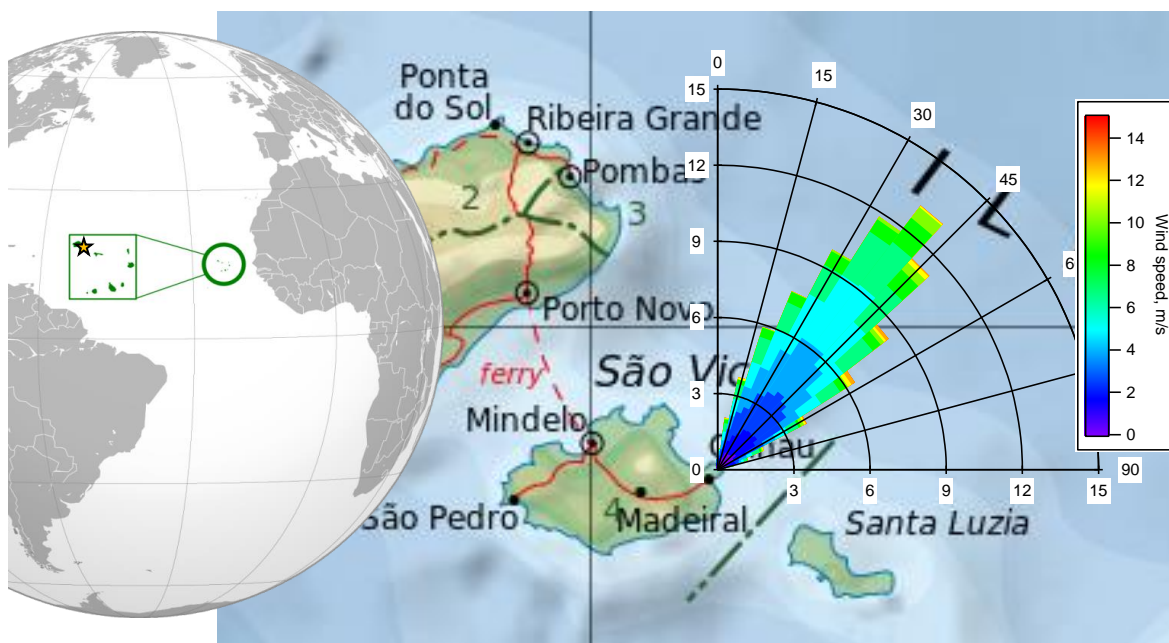

Figure S1. Location of CVO on the globe, and within the Cape Verde archipelago. Also shown is the wind rose data (centred on the site) for the data used in the analysis of  $\text{NO}_x$  data.

## Box model description

The Dynamically Simple Model of Atmospheric Chemical Complexity (DSMACC) atmospheric chemistry box model (Emmerson and Evans, 2009) is used to interpret the  $\text{NO}_x$  observations. It uses the Kinetic PreProcessor (KPP-2.1, Damian et al., 2002) to solve ordinary differential equations generated from the reactions and their kinetic information (Sandu and Sander, 2006).

Rate information is assimilated from; Master Chemical Mechanism for near explicit organic reactions (MCMv3.3.1, Bloss et al., 2005; Jenkin et al., 1997, 2003, 2015; Saunders et al., 2003); inorganic rates are taken from IUPAC (Atkinson et al., 2004, 2007) and JPL (Burkholder et al., 2015) evaluated databases and are detailed in tables below; clear sky photolysis rates are calculated by the Tropospheric Ultraviolet and Visible model (TUV, [www2.aom.ucar.edu/modeling/tuv-download](http://www2.aom.ucar.edu/modeling/tuv-download); Madronich, 1993).

Table ST1. Rates of  $\text{O}_x$  reactions used in DSMACC model.

| O <sub>x</sub> reactions |                                            |                                                                                                                                                          |                           |
|--------------------------|--------------------------------------------|----------------------------------------------------------------------------------------------------------------------------------------------------------|---------------------------|
| #                        | Reaction                                   | Rate                                                                                                                                                     | Reference                 |
| 1                        | O + O <sub>2</sub> → O <sub>3</sub>        | $(6.00 \times 10^{-34} [\text{O}_2][\text{O}_2](\text{TEMP}/300)^{-2.6}) +$<br>$(5.60 \times 10^{-34} [\text{O}_2][\text{N}_2](\text{TEMP}/300)^{-2.6})$ | (Burkholder et al., 2015) |
| 2                        | O + O <sub>3</sub> → 2O <sub>2</sub>       | $8.00 \times 10^{-12} e^{(-2060/\text{TEMP})}$                                                                                                           | (Burkholder et al., 2015) |
| 2                        | O <sup>1</sup> D + <i>M</i> → O + <i>M</i> | $(3.30 \times 10^{-11} [\text{O}_2] e^{(55/\text{TEMP})}) +$<br>$(2.15 \times 10^{-11} [\text{N}_2] e^{(110/\text{TEMP})})$                              | (Burkholder et al., 2015) |
| 2                        | O <sup>1</sup> D + H <sub>2</sub> O → 2OH  | $1.63 \times 10^{-10} [\text{H}_2\text{O}] e^{(60/\text{TEMP})}$                                                                                         | (Burkholder et al., 2015) |
| 5                        | O <sup>1</sup> D + O <sub>3</sub> → O      | $2.40 \times 10^{-10} [\text{O}_3](0/\text{TEMP})$                                                                                                       | (Burkholder et al., 2015) |

1

2 Table TS2. Rates of HO<sub>x</sub> reactions used in DSMACC model.

| HO <sub>x</sub> reactions |                                                          |                                                                                                                                                                                                                                      |                           |
|---------------------------|----------------------------------------------------------|--------------------------------------------------------------------------------------------------------------------------------------------------------------------------------------------------------------------------------------|---------------------------|
| #                         | Reaction                                                 | Rate                                                                                                                                                                                                                                 | Reference                 |
| 1                         | O + OH → H + O <sub>2</sub>                              | $1.80 \times 10^{-11} e^{(180/TEMP)}$                                                                                                                                                                                                | (Burkholder et al., 2015) |
| 2                         | O + HO <sub>2</sub> → OH + O <sub>2</sub>                | $3.00 \times 10^{-11} e^{(200/TEMP)}$                                                                                                                                                                                                | (Burkholder et al., 2015) |
| 3                         | O + H <sub>2</sub> O <sub>2</sub> → OH + HO <sub>2</sub> | $1.40 \times 10^{-10} e^{(-2000/TEMP)}$                                                                                                                                                                                              | (Burkholder et al., 2015) |
| 4                         | H + O <sub>3</sub> → OH + O <sub>2</sub>                 | $1.40 \times 10^{-10} e^{(-470/TEMP)}$                                                                                                                                                                                               | (Burkholder et al., 2015) |
| 5                         | H + HO <sub>2</sub> → 2OH                                | $7.20 \times 10^{-11} e^{(0/TEMP)}$                                                                                                                                                                                                  | (Burkholder et al., 2015) |
| 6                         | OH + O <sub>3</sub> → HO <sub>2</sub> + O <sub>2</sub>   | $1.70 \times 10^{-12} e^{(-940/TEMP)}$                                                                                                                                                                                               | (Burkholder et al., 2015) |
| 7                         | OH + OH → O + H <sub>2</sub> O                           | $1.80 \times 10^{-12} e^{(0/TEMP)}$                                                                                                                                                                                                  | (Burkholder et al., 2015) |
| 8                         | OH + HO <sub>2</sub> → H <sub>2</sub> O + O <sub>2</sub> | $4.80 \times 10^{-11} e^{(250/TEMP)}$                                                                                                                                                                                                | (Burkholder et al., 2015) |
| 9                         | OH + H <sub>2</sub> O <sub>2</sub> → HO <sub>2</sub>     | $2.90 \times 10^{-12} e^{(-160/TEMP)}$                                                                                                                                                                                               | (Atkinson et al., 2004)   |
| 10                        | OH + H <sub>2</sub> → H <sub>2</sub> O + H               | $2.80 \times 10^{-12} e^{(-1800/TEMP)}$                                                                                                                                                                                              | (Burkholder et al., 2015) |
| 11                        | OH + CO → HO <sub>2</sub>                                | $1.44 \times 10^{-13} \times (1 + ([M]/4.2 \times 10^{19}))$                                                                                                                                                                         | (Atkinson et al., 2004)   |
| 12                        | HO <sub>2</sub> + O <sub>3</sub> → OH + O <sub>2</sub>   | $1.00 \times 10^{-14} e^{(-490/TEMP)}$                                                                                                                                                                                               | (Burkholder et al., 2015) |
| 13                        | 2HO <sub>2</sub> → H <sub>2</sub> O <sub>2</sub>         | $(2.20 \times 10^{-13} \times (1 + (1.40 \times 10^{-21} e^{(2200/TEMP)} \times [H_2O]) \times e^{(600/TEMP)}) + (1.90 \times 10^{-33} [M] \times (1 + (1.40 \times 10^{-21} e^{(2200/TEMP)} \times [H_2O]) \times e^{(980/TEMP)}))$ | (Atkinson et al., 2004)   |

1

2 Table TS3. Rates of NO<sub>x</sub> reactions used in DSMACC model.

| NO <sub>x</sub> reactions |                                                        |                                                |                           |
|---------------------------|--------------------------------------------------------|------------------------------------------------|---------------------------|
| #                         | Reaction                                               | Rate                                           | Reference                 |
| 1                         | O + NO → NO <sub>2</sub>                               | $5.00 \times 10^{-11} (TEMP/300)^{-0.3}$       | (Atkinson et al., 2004)   |
| 2                         | O + NO <sub>2</sub> → NO <sub>3</sub>                  | $1.30 \times 10^{-31} (TEMP/300)^{-1.5} [N_2]$ | (Atkinson et al., 2004)   |
| 3                         | O + NO <sub>3</sub> → NO <sub>2</sub> + O <sub>2</sub> | $1.00 \times 10^{-11} e^{(0/TEMP)}$            | (Burkholder et al., 2015) |
| 4                         | O + NO <sub>2</sub> → NO + O <sub>2</sub>              | $5.10 \times 10^{-12} e^{(210/TEMP)}$          | (Burkholder et al., 2015) |
| 5                         | H + NO <sub>2</sub> → OH + NO                          | $4.00 \times 10^{-10} e^{(-3400/TEMP)}$        | (Burkholder et al., 2015) |
| 6                         | OH + HONO → NO <sub>2</sub> + H <sub>2</sub> O         | $2.50 \times 10^{-12} e^{(260/TEMP)}$          | (Atkinson et al., 2004)   |

|    |                                                                              |                                                                                      |                           |
|----|------------------------------------------------------------------------------|--------------------------------------------------------------------------------------|---------------------------|
| 7  | $\text{HO}_2 + \text{NO} \rightarrow \text{OH} + \text{NO}_2$                | $3.30 \times 10^{-12} e^{(270/\text{TEMP})}$                                         | (Burkholder et al., 2015) |
| 8  | $\text{HO}_2 + \text{NO}_2 \rightarrow \text{HO}_2\text{NO}_2$               | $1.40 \times 10^{-31} (\text{TEMP}/300)^{-3.1} [\text{N}_2^2]$                       | (Atkinson et al., 2004)   |
| 9  | $\text{HO}_2 + \text{NO}_3 \rightarrow \text{OH} + \text{NO}_2$              | $4.00 \times 10^{-12} e^{(0/\text{TEMP})}$                                           | (Atkinson et al., 2004)   |
| 10 | $\text{NO} + \text{O}_3 \rightarrow \text{NO}_2 + \text{O}_2$                | $3.00 \times 10^{-12} e^{(-1500/\text{TEMP})}$                                       | (Burkholder et al., 2015) |
| 11 | $\text{NO} + \text{NO}_3 \rightarrow \text{NO}_2 + \text{NO}_2$              | $1.50 \times 10^{-11} e^{(170/\text{TEMP})}$                                         | (Burkholder et al., 2015) |
| 12 | $\text{NO}_2 + \text{O}_3 \rightarrow \text{NO} + 2\text{O}_2$               | $1.20 \times 10^{-13} e^{(-2450/\text{TEMP})}$                                       | (Burkholder et al., 2015) |
| 13 | $\text{NO}_2 + \text{NO}_3 \rightarrow \text{NO} + \text{NO}_2 + \text{O}_2$ | $4.50 \times 10^{-14} e^{(1260/\text{TEMP})}$                                        | (Burkholder et al., 2015) |
| 14 | $2\text{NO}_3 \rightarrow 2\text{NO}_2 + \text{O}_2$                         | $8.50 \times 10^{-13} e^{(-2450/\text{TEMP})}$                                       | (Burkholder et al., 2015) |
| 15 | $\text{NO}_2 + \text{NO}_3 \rightarrow \text{N}_2\text{O}_5$                 | $3.60 \times 10^{-30} (\text{TEMP}/300)^{-4.1} [\text{N}_2]$                         | (Atkinson et al., 2004)   |
| 16 | $\text{N}_2\text{O}_5 \rightarrow \text{NO}_3 + \text{NO}_2$                 | $1.30 \times 10^{-3} (\text{TEMP}/300)^{-3.5} e^{(-11000/\text{TEMP})} [\text{N}_2]$ | (Atkinson et al., 2004)   |
| 17 | $\text{OH} + \text{NO} \rightarrow \text{HONO}$                              | $7.40 \times 10^{-31} (\text{TEMP}/300)^{-2.4} [\text{N}_2]$                         | (Atkinson et al., 2004)   |
| 18 | $\text{OH} + \text{NO}_2 \rightarrow \text{HNO}_3$                           | $3.20 \times 10^{-30} (\text{TEMP}/300)^{-4.5} [\text{N}_2]$                         | (Atkinson et al., 2004)   |
| 19 | $\text{OH} + \text{NO}_3 \rightarrow \text{HO}_2 + \text{NO}_2$              | $2.00 \times 10^{-11} e^{(0/\text{TEMP})}$                                           | (Atkinson et al., 2004)   |
| 20 | $\text{HO}_2\text{NO}_2 \rightarrow \text{NO}_2 + \text{HO}_2$               | $4.10 \times 10^{-5} e^{(-10650/\text{TEMP})} [\text{N}_2]$                          | (Atkinson et al., 2004)   |
| 21 | $\text{OH} + \text{HNO}_3 \rightarrow \text{NO}_3 + \text{H}_2\text{O}$      | $1.50 \times 10^{-13}$                                                               | (Atkinson et al., 2004)   |
| 22 | $\text{OH} + \text{HO}_2\text{NO}_2 \rightarrow \text{NO}_2 + \text{prods}$  | $3.20 \times 10^{-12} e^{(690/\text{TEMP})}$                                         | (Atkinson et al., 2004)   |

1

2 Table TS4. Rates of Bromine reactions used in DSMACC model.

| Bromine reactions |                                                                     |                                                              |                             |
|-------------------|---------------------------------------------------------------------|--------------------------------------------------------------|-----------------------------|
| #                 | Reaction                                                            | Rate                                                         | Reference                   |
| 1                 | $\text{Br} + \text{O}_3 \rightarrow \text{BrO} + \text{O}_2$        | $1.70 \times 10^{-11} e^{(-800/\text{TEMP})}$                | (Atkinson et al., 2007)     |
| 2                 | $\text{BrO} + \text{NO}_2 \rightarrow \text{BrNO}_3$                | $5.20 \times 10^{-31} ((\text{TEMP}/300.)^{-3.2})[\text{M}]$ | (Burkholder et al., 2015)   |
| 3                 | $\text{BrNO}_3 \rightarrow \text{BrO} + \text{NO}_2$                | $2.80 \times 10^{13} e^{(-12360/\text{TEMP})}$               | (Orlando and Tyndall, 2002) |
| 4                 | $\text{BrO} + \text{HO}_2 \rightarrow \text{HOBr} + \text{O}_2$     | $4.50 \times 10^{-12} e^{(500/\text{TEMP})}$                 | (Atkinson et al., 2007)     |
| 5                 | $\text{Br} + \text{HO}_2 \rightarrow \text{HBr} + \text{O}_2$       | $4.80 \times 10^{-12} e^{(-310/\text{TEMP})}$                | (Burkholder et al., 2015)   |
| 6                 | $\text{HBr} + \text{OH} \rightarrow \text{Br} + \text{H}_2\text{O}$ | $1.10 \times 10^{-11}$                                       | (Atkinson et al., 2007)     |

|    |                                                                   |                                                    |                           |
|----|-------------------------------------------------------------------|----------------------------------------------------|---------------------------|
| 7  | $\text{BrO} + \text{NO} \rightarrow \text{Br} + \text{NO}_2$      | $8.70 \times 10^{-12} e^{(260/\text{TEMP})}$       | (Atkinson et al., 2007)   |
| 8  | $2\text{BrO} \rightarrow 2\text{Br} + \text{O}_2$                 | $2.36 \times 10^{-12} e^{(40/\text{TEMP})}$        |                           |
| 9  | $2\text{BrO} \rightarrow \text{Br}_2 + \text{O}_2$                | $2.79 \times 10^{-14} e^{(860/\text{TEMP})}$       |                           |
| 10 | $\text{Br} + \text{HCHO} \rightarrow \text{HBr} + \text{HO}_2$    | $1.70 \times 10^{-11} e^{(-800/\text{TEMP})}$      | (Burkholder et al., 2015) |
| 11 | $\text{Br} + \text{NO}_3 \rightarrow \text{BrO} + \text{NO}_2$    | $1.60 \times 10^{-11}$                             | (Burkholder et al., 2015) |
| 12 | $\text{HOBr} + \text{NO}_3 \rightarrow \text{BRO} + \text{HNO}_3$ | $2.7 \times 10^{-12} e^{(300/\text{TEMP})^{2.66}}$ | <i>This work</i>          |

1

2 Table TS5. Rates of Iodine reactions used in DSMACC model.

| Iodine reactions |                                                                 |                                                            |                                             |
|------------------|-----------------------------------------------------------------|------------------------------------------------------------|---------------------------------------------|
| #                | Reaction                                                        | Rate                                                       | Reference                                   |
| 1                | $\text{I} + \text{HO}_2 \rightarrow \text{HI}$                  | $1.50 \times 10^{-11} e^{(-1090/\text{TEMP})}$             | (Atkinson et al., 2007)                     |
| 2                | $\text{IO} + \text{NO}_2 \rightarrow \text{INO}_3$              | $7.70 \times 10^{-31} ((\text{TEMP}/300)^{-5})[\text{M}]$  | (Atkinson et al., 2007)                     |
| 3                | $\text{INO}_3 \rightarrow \text{IO} + \text{NO}_2$              | $1.10 \times 10^{15} e^{(-12060/\text{TEMP})}$             | (Atkinson et al., 2007)                     |
| 4                | $\text{OH} + \text{HI} \rightarrow \text{I}$                    | $3.00 \times 10^{-11}$                                     | (Burkholder et al., 2015)                   |
| 5                | $\text{IO} + \text{NO} \rightarrow \text{NO}_2 + \text{I}$      | $7.15 \times 10^{-12} e^{(300/\text{TEMP})}$               | (Atkinson et al., 2007)                     |
| 6                | $\text{I} + \text{O}_3 \rightarrow \text{IO} + \text{O}_2$      | $2.30 \times 10^{-11} e^{(-870/\text{TEMP})}$              | (Burkholder et al., 2015)                   |
| 7                | $\text{IO} + \text{HO}_2 \rightarrow \text{HOI} + \text{O}_2$   | $1.40 \times 10^{-11} e^{(540/\text{TEMP})}$               | (Atkinson et al., 2007)                     |
| 8                | $\text{HOI} + \text{OH} \rightarrow \text{IO}$                  | $2.00 \times 10^{-13}$                                     | (Mössinger and Cox, 2001)                   |
| 9                | $2\text{IO} \rightarrow \text{I} + \text{OIO}$                  | $(5.40 \times 10^{-11} e^{(180/\text{TEMP})}) \times 0.38$ | (Atkinson et al., 2007; Bloss et al., 2001) |
| 10               | $2\text{IO} \rightarrow 2\text{I} + \text{O}_2$                 | $(5.40 \times 10^{-11} e^{(180/\text{TEMP})}) \times 0.11$ | (Atkinson et al., 2007; Bloss et al., 2001) |
| 11               | $\text{OIO} + \text{NO} \rightarrow \text{IO} + \text{NO}_2$    | $1.10 \times 10^{-12} e^{(542/\text{TEMP})}$               | (Plane et al., 2006)                        |
| 12               | $\text{I}_2 + \text{NO}_3 \rightarrow \text{INO}_3 + \text{I}$  | $1.50 \times 10^{-12}$                                     | (Atkinson et al., 2007)                     |
| 13               | $\text{I} + \text{NO}_3 \rightarrow \text{IO} + \text{NO}_2$    | $1.00 \times 10^{-10}$                                     | (Atkinson et al., 2007)                     |
| 14               | $\text{HOI} + \text{NO}_3 \rightarrow \text{IO} + \text{HNO}_3$ | $2.70 \times 10^{-12} e^{(300/\text{TEMP})^{2.66}}$        | (Saiz-Lopez et al., 2016)                   |

3 Table TS6. Rates of mixed halogen reactions used in DSMACC model.

| Mixed halogen reactions |                                                                                  |                                              |                           |
|-------------------------|----------------------------------------------------------------------------------|----------------------------------------------|---------------------------|
| #                       | Reaction                                                                         | Rate                                         | Reference                 |
| 1                       | $\text{BrO} + \text{IO} \rightarrow \text{Br} + 0.8 \text{ OIO} + 0.2 \text{ I}$ | $1.50 \times 10^{-11} e^{(510/\text{TEMP})}$ | (Atkinson et al., 2007)   |
| 2                       | $\text{I} + \text{BrO} \rightarrow \text{IO} + \text{Br}$                        | $1.20 \times 10^{-11}$                       | (Burkholder et al., 2015) |
| 3                       | $\text{Br} + \text{IO} \rightarrow \text{BrO} + \text{I}$                        | $2.70 \times 10^{-11}$                       |                           |

1

2 Table TS7. Aerosol reactive uptake coefficients ( $\gamma$ ) used in DSMACC model. UPTAKE( $\gamma$ , Temp, Surface Area,  
3 Mass).

| Aerosol reactions |                                                           |           |                                                                 |
|-------------------|-----------------------------------------------------------|-----------|-----------------------------------------------------------------|
| #                 | Reaction                                                  | $\gamma$  | Reference                                                       |
| 1                 | $\text{N}_2\text{O}_5 \rightarrow 2 \times \text{p-NO}_3$ | 0.02      | (Crowley et al., 2010) <sup>a</sup>                             |
| 2                 | $\text{HNO}_3 \rightarrow \text{p-NO}_3$                  | 0.15      | (Crowley et al., 2010) <sup>a</sup>                             |
| 3                 | $\text{NO}_3 \rightarrow \text{p-NO}_3$                   | 0.012     | (Crowley et al., 2010) <sup>a</sup>                             |
| 4                 | $\text{HOBr} \rightarrow 0.5 \text{ Br}_2$                | 0.02-0.80 | (Saiz-Lopez et al., 2008) <sup>b</sup>                          |
| 5                 | $\text{BrNO}_3 \rightarrow \text{HOBr} + \text{p-NO}_3$   | 0.02-0.80 | (Burkholder et al., 2015; Saiz-Lopez et al., 2008) <sup>b</sup> |
| 6                 | $\text{HBr} \rightarrow 0.5 \text{ Br}_2$                 | 0.02-0.80 | (Saiz-Lopez et al., 2008) <sup>b</sup>                          |
| 7                 | $\text{HOI} \rightarrow 0.5 \text{ I}_2$                  | 0.02-0.80 | (Saiz-Lopez et al., 2008) <sup>b</sup>                          |
| 8                 | $\text{HI} \rightarrow 0.5 \text{ I}_2$                   | 0.02-0.80 | (Saiz-Lopez et al., 2008) <sup>b</sup>                          |
| 9                 | $\text{INO}_3 \rightarrow \text{HOI} + \text{p-NO}_3$     | 0.02-0.80 | (Burkholder et al., 2015; Saiz-Lopez et al., 2008) <sup>b</sup> |

4 <sup>a</sup> Data from IUPAC datasheets of uptake coefficients on Saharan dust.

5 <sup>b</sup> sensitivity analysis performed on uptake coefficients.

6

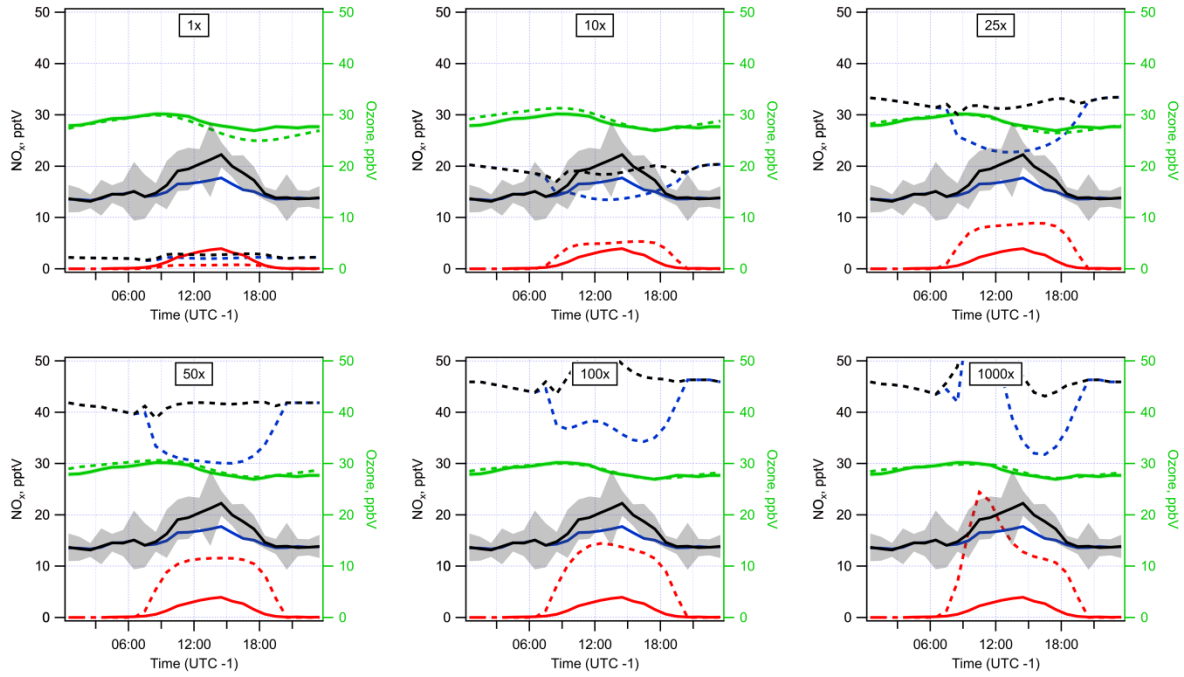

Figure S2. The modelled diurnal profile of NO<sub>x</sub> at CVO during summer months when photolysis of nitrate is considered. The rate of particulate nitrate photolysis has been scaled to the rate of HNO<sub>3</sub> photolysis by factors of 1, 10, 25, 50, 100, and 1000. Observations are solid lines whilst modelled values are shown dashed. Shaded areas are standard error of the observation. O<sub>3</sub> – green; NO<sub>x</sub> – black; NO<sub>2</sub> – blue; NO – red.

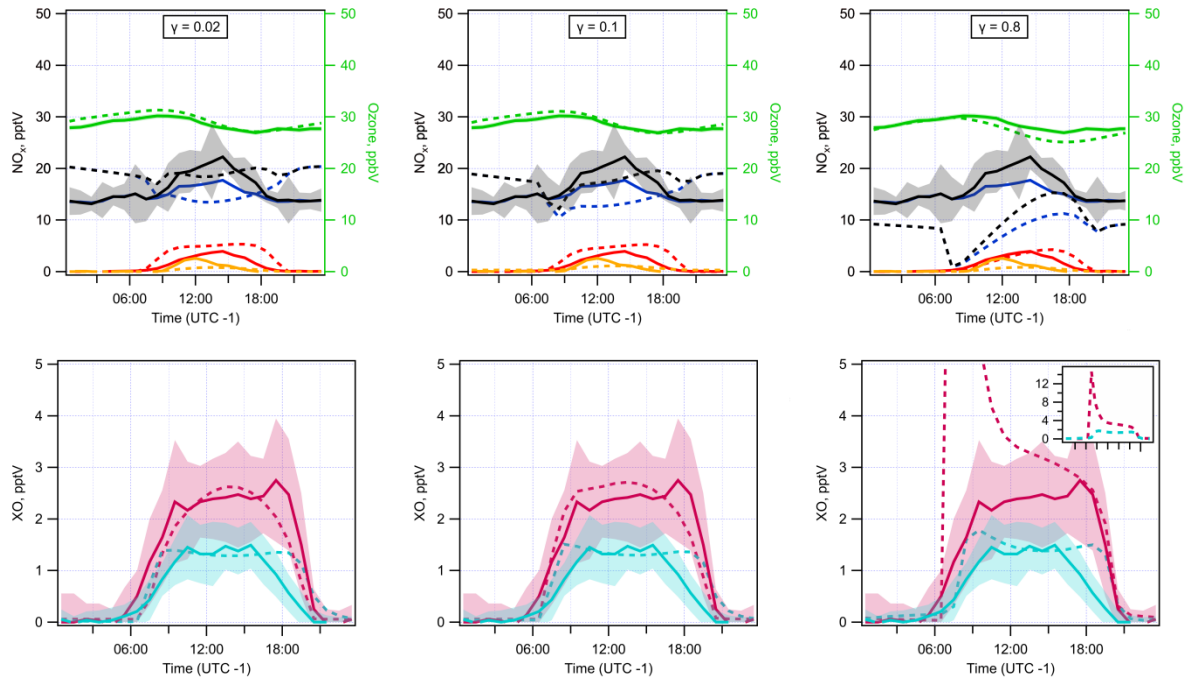

Figure S3. Sensitivity analysis of the effect of changing reactive uptake co-efficients ( $\gamma$ ) of reactive halogens (XO, XHO, XONO<sub>2</sub>, X = Br, I) on NO<sub>x</sub> (top) and XO (bottom) diurnal

behaviour during summer months at CVO. Particulate nitrate photolysis is set at 10 times the rate of gaseous HNO<sub>3</sub>. Observations are solid lines whilst modelled values are shown as dashed. IO and BrO observations are adapted from Read et al., (2008). Shaded areas are standard error of the observation. O<sub>3</sub> – green; NO<sub>x</sub> – black; NO<sub>2</sub> – blue; NO – red; HONO – yellow; IO – turquoise; BrO – purple.

## References

- Atkinson, R., Baulch, D. L., Cox, R. A., Crowley, J. N., Hampson, R. F., Hynes, R. G., Jenkin, M. E., Rossi, M. J. and Troe, J.: Evaluated kinetic and photochemical data for atmospheric chemistry: Volume I - gas phase reactions of O<sub>x</sub>, HO<sub>x</sub>, NO<sub>x</sub> and SO<sub>x</sub> species, *Atmos. Chem. Phys.*, 4(6), 1461–1738, doi:10.5194/acp-4-1461-2004, 2004.
- Atkinson, R., Baulch, D. L., Cox, R. A., Crowley, J. N., Hampson, R. F., Hynes, R. G., Jenkin, M. E., Rossi, M. J. and Troe, J.: Evaluated kinetic and photochemical data for atmospheric chemistry: Volume III - gas phase reactions of inorganic halogens, *Atmos. Chem. Phys.*, 7(4), 981–1191, doi:10.5194/acp-7-981-2007, 2007.
- Bloss, C., Wagner, V., Jenkin, M. E., Volkamer, R., Bloss, W. J., Lee, J. D., Heard, D. E., Wirtz, K., Martin-Reviejo, M., Rea, G., Wenger, J. C. and Pilling, M. J.: Development of a detailed chemical mechanism (MCMv3.1) for the atmospheric oxidation of aromatic hydrocarbons, *Atmos. Chem. Phys.*, 5(3), 641–664, doi:10.5194/acp-5-641-2005, 2005.
- Bloss, W. J., Rowley, D. M., Cox, R. A. and Jones, R. L.: Kinetics and Products of the IO Self-Reaction, *J. Phys. Chem. A*, 105(33), 7840–7854, doi:10.1021/jp0044936, 2001.
- Burkholder, J. B., Sander, S. P., Abbatt, J., Barker, J. R., Huie, R. E., Kolb, C. E., Kurylo, M. J., Orkin, V. L., Wilmouth, D. M. and Wine, P. H.: Chemical Kinetics and Photochemical Data for Use in Atmospheric Studies, Evaluation No. 18, JPL Publ. 15-10, 15(10), 2015.
- Crowley, J. N., Ammann, M., Cox, R. A., Hynes, R. G., Jenkin, M. E., Mellouki, A., Rossi, M. J., Troe, J. and Wallington, T. J.: Evaluated kinetic and photochemical data for atmospheric chemistry: Volume v -heterogeneous reactions on solid substrates, *Atmos. Chem. Phys.*, 10, 9059–9223, doi:10.5194/acp-10-9059-2010, 2010.
- Damian, V., Sandu, A., Damian, M., Potra, F. and Carmichael, G. R.: The kinetic



1 preprocessor KPP-a software environment for solving chemical kinetics, *Comput. Chem.*  
2 *Eng.*, 26(11), 1567–1579, doi:10.1016/S0098-1354(02)00128-X, 2002.

3 Emmerson, K. M. and Evans, M. J.: Comparison of tropospheric gas-phase chemistry  
4 schemes for use within global models, *Atmos. Chem. Phys.*, (1990), 1831–1845,  
5 doi:10.5194/acpd-8-19957-2008, 2009.

6 Jenkin, M. E., Saunders, S. M. and Pilling, M. J.: The tropospheric degradation of volatile  
7 organic compounds: a protocol for mechanism development, *Atmos. Environ.*, 31(1), 81–104,  
8 doi:10.1016/S1352-2310(96)00105-7, 1997.

9 Jenkin, M. E., Saunders, S. M., Wagner, V. and Pilling, M. J.: Protocol for the development  
10 of the Master Chemical Mechanism, MCM v3 (Part B): tropospheric degradation of aromatic  
11 volatile organic compounds, *Atmos. Chem. Phys.*, 3(1), 181–193, doi:10.5194/acp-3-181-  
12 2003, 2003.

13 Jenkin, M. E., Young, J. C. and Rickard, A. R.: The MCM v3.3.1 degradation scheme for  
14 isoprene, *Atmos. Chem. Phys.*, 15(20), 11433–11459, doi:10.5194/acp-15-11433-2015, 2015.

15 Madronich, S.: UV radiation in the natural and perturbed atmosphere, in *UV-B radiation and*  
16 *ozone depletion: effects on humans, animals, plants, microorganisms, and materials*, edited  
17 by M. Tevini, pp. 17–61, Lewis Publishers, Boca Raton, FL, USA., 1993.

18 Mössinger, J. C. and Cox, R. A.: Heterogeneous Reaction of HOI with Sodium Halide Salts,  
19 *J. Phys. Chem. A*, 105(21), 5165–5177, doi:10.1021/jp0044678, 2001.

20 Orlando, J. J. and Tyndall, G. S.: Mechanisms for the Reactions of OH with Two Unsaturated  
21 Aldehydes: Crotonaldehyde and Acrolein, *J. Phys. Chem. A*, 106(51), 12252–12259,  
22 doi:10.1021/jp021530f, 2002.

23 Plane, J. M. C., Joseph, D. M., Allan, B. J., Ashworth, S. H. and Francisco, J. S.: An  
24 Experimental and Theoretical Study of the Reactions  $\text{OIO} + \text{NO}$  and  $\text{OIO} + \text{OH}$ , *J. Phys.*  
25 *Chem. A*, 110(1), 93–100, doi:10.1021/jp055364y, 2006.

26 Saiz-Lopez, A., Plane, J. M. C., Cuevas, C. A., Mahajan, A. S., Lamarque, J.-F. and  
27 Kinnison, D. E.: Iodine chemistry after dark, *Atmos. Chem. Phys. Discuss.*, 0(June), 1–39,  
28 doi:10.5194/acp-2016-428, 2016.

1 Saiz-Lopez, A., Plane, J. M. C., Mahajan, a S., Anderson, P. S., Bauguitté, S. J.-B., Jones, a  
2 E., Roscoe, H. K., Salmon, R. a, Bloss, W. J., Lee, J. D. and Heard, D. E.: On the vertical  
3 distribution of boundary layer halogens over coastal Antarctica: implications for O<sub>3</sub>, HO<sub>x</sub>,  
4 NO<sub>x</sub> and the Hg lifetime, *Atmos. Chem. Phys.*, 8(4), 887–900, doi:10.5194/acp-8-887-2008,  
5 2008.

6 Sandu, A. and Sander, R.: Technical note: Simulating chemical systems in Fortran90 and  
7 Matlab with the Kinetic PreProcessor KPP-2.1, *Atmos. Chem. Phys.*, 6(1), 187–195,  
8 doi:10.5194/acp-6-187-2006, 2006.

9 Saunders, S. M., Jenkin, M. E., Derwent, R. G. and Pilling, M. J.: Protocol for the  
10 development of the Master Chemical Mechanism, MCM v3 (Part A): tropospheric  
11 degradation of non-aromatic volatile organic compounds, *Atmos. Chem. Phys.*, 3(1), 161–  
12 180, doi:10.5194/acp-3-161-2003, 2003.

13
