# Supplementary material for: Evidence for renoxification in the tropical marine boundary layer
Source: Copernicus journal article supplement (doi:10.5194/acp-17-4081-2017), 2017-03-27
Supplement: Supplementary file 2 [file acp-17-4081-2017-supplement.zip]

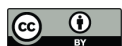

## *Supplement of*

# **Evidence for renoxification in the tropical marine boundary layer**

**Chris Reed et al.**

*Correspondence to:* Chris Reed ([chris.paul.reed@gmail.com](mailto:chris.paul.reed@gmail.com))

- [acp-17-4081-2017-supplement-title-page.pdf](#)
- [CV0001G.20140101000000.20141231000000.NOx.air.1y.1h.nas.csv](#)
- [Supplement.pdf](#)

The copyright of individual parts of the supplement might differ from the CC-BY 3.0 licence.
